# Supplementary material
Source: PubMed Central journal article supplement (PMC3428160)

## **Supporting Information**

### **Comparative Neuropeptidomic Analysis of Food Intake via a Multi-faceted Mass Spectrometric Approach**

**Ruibing Chen, Limei Hui, Stephanie S. Cape, Junhua Wang and Lingjun Li\***

Department of Chemistry & School of Pharmacy, University of Wisconsin-Madison, 777  
Highland Avenue, Madison, WI 53705-2222

**Figure S1.** Representative mass spectra of reverse formaldehyde labeling of two extract samples from the pericardial organs. (a) The first sample was labeled with H<sub>2</sub>-formaldehyde, and the second sample was labeled with D<sub>2</sub>-formaldehyde. Then the two samples were mixed and analyzed using MALDI-FTMS. (b) The isotopic labeling reagent for each sample was reversed. Similar ratios of peptide peaks were observed. Peaks labeled with H<sub>2</sub>-formaldehyde were indicated with open circles, and peaks labeled with D<sub>2</sub>-formaldehyde were indicated with closed circles.

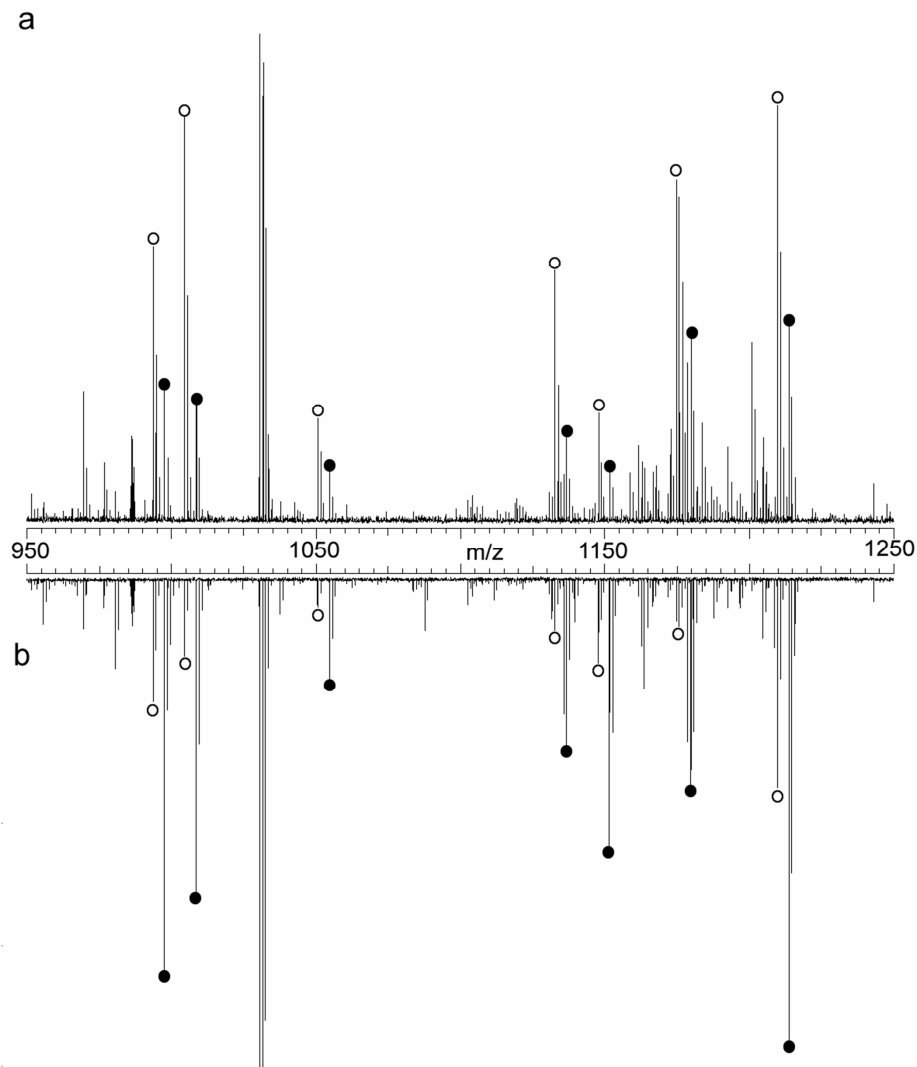

**Figure S2.** Abundance ratios of 25 neuropeptides in fed crab brain versus unfed crab brain based on five groups of feeding experiments. The masses of each neuropeptide are labeled on the X axis and they are grouped in peptide families. Y axis shows the abundance ratios of each neuropeptide between fed and unfed crabs. The error bars indicate standard deviation of four MS measurements for each sample.

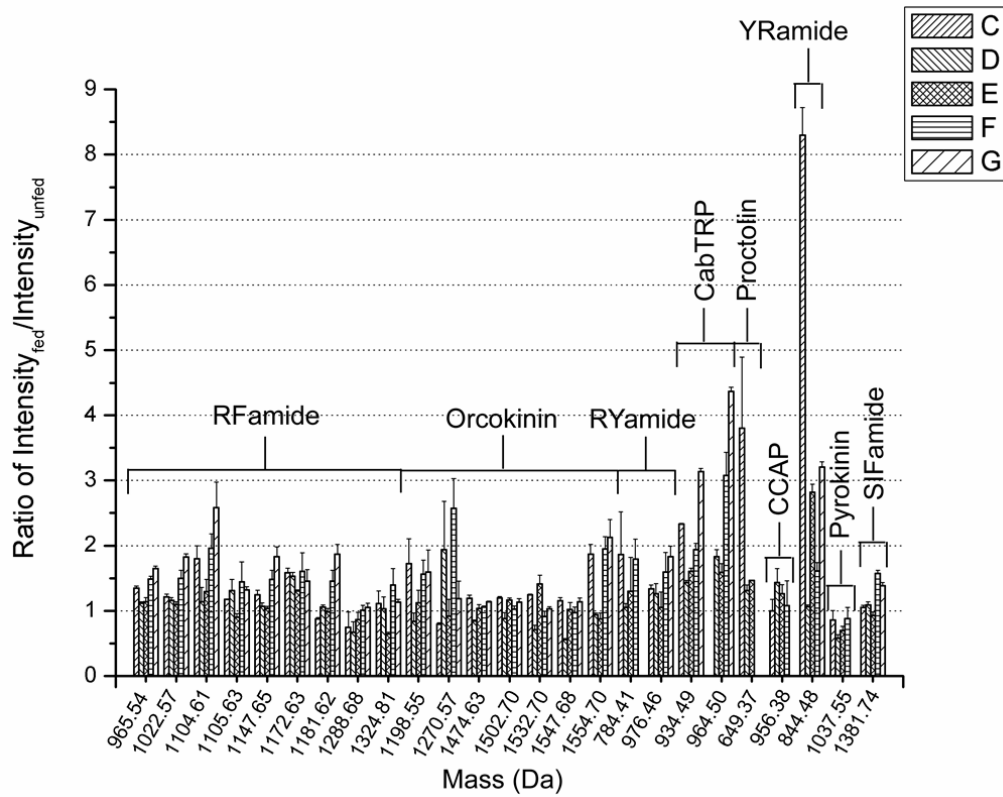

Supplement: cn900028s_si_001.pdf [file cn900028s_si_001.pdf]
